# Supplementary material
Source: HighWire-hosted journal article supplement (https://jmg.bmj.com/content/jmedgenet-2017-105134)
Supplement: inline-supplementary-material-4 [file inline-supplementary-material-4.pdf]

## SUPPLEMENTARY TABLES

### Supplementary Table S1

Demographic and clinical characteristics of the PROVIDE Bangladeshi families.

| Characteristic                                   | PROVIDE<br>Mirpur<br>MalChip | PROVIDE<br>Mirpur<br>GWAS | CRYPTO<br>Mirpur<br>GWAS | CRYPTO<br>Mirzapur<br>GWAS |
|--------------------------------------------------|------------------------------|---------------------------|--------------------------|----------------------------|
| Demographic Area                                 | Urban                        | Urban                     | Urban                    | Rural                      |
| Number of Families                               | 616                          | 532                       | 402                      | 208                        |
| <i>Mother at Enrollment</i>                      |                              |                           |                          |                            |
| Age, years                                       | 24.8 (4.6)                   | 24.9 (4.7)                | 24.4 (4.4)               | 23.8 (4.8)                 |
| Height, cm                                       | 150.4 (5.5)                  | 150.6 (5.5)               | 149.8 (5.2)              | 150.7 (5.2)                |
| Postpartum weight, kg                            | 49.4 (9.4)                   | 49.7 (9.5)                | 51.8 (9.3)               | 52.6 (8.9)                 |
| Postpartum BMI, kg/m <sup>2</sup>                | 21.8 (3.6)                   | 21.9 (3.7)                | 23.1 (3.9)               | 23.1 (3.4)                 |
| First live birth, n (%)                          | 235 (38.1)                   | 197 (37.0)                | 156 (38.8)               | 83 (39.9)                  |
| Monthly household income, Taka 000s <sup>a</sup> | 13.0 (9.7)                   | 12.9 (9.6)                | 17.2 (14.7)              | 20.1 (14.5)                |
| Mother's Education level                         |                              |                           |                          |                            |
| None, n (%)                                      | 174 (28.2)                   | 154 (28.9)                | 86 (21.4)                | 8 (3.8)                    |
| Primary, n (%)                                   | 236 (38.3)                   | 201 (37.8)                | 162 (40.39)              | 54 (26.0)                  |
| Secondary, n (%)                                 | 111 (18.0)                   | 99 (18.6)                 | 89 (22.1)                | 73 (35.1)                  |
| Higher, n (%)                                    | 95 (15.4)                    | 78 (14.7)                 | 65 (16.2)                | 73 (35.1)                  |
| <i>Infant at Enrollment</i>                      |                              |                           |                          |                            |
| Male, n (%)                                      | 325 (52.8)                   | 282 (53.0)                | 188 (46.8)               | 116 (55.8)                 |
| Age, days                                        | 5.0 (1.7)                    | 5.0 (1.7)                 | 3.5 (1.8)                | 0.5 (0.6)                  |
| Weight, kg                                       | 2.78 (0.37)                  | 2.77 (0.37)               | 2.76 (0.38)              | 2.74 (0.40)                |

|                                      |              |              |              |              |
|--------------------------------------|--------------|--------------|--------------|--------------|
| Height, cm                           | 48.7 (1.8)   | 48.7 (1.7)   | 48.3 (1.7)   | 48.7 (2.1)   |
| Length-for-age Z (LAZ)               | -0.97 (0.93) | -0.92 (0.88) | -0.95 (0.89) | -0.87 (1.07) |
| Stunted, LAZ < -2, n (%)             | 63 (10.2)    | 53 (10.0)    | 55 (13.7)    | 31 (14.9)    |
| Weight-for-age Z (WAZ)               | -1.00 (0.89) | -1.30 (0.83) | -1.27 (0.87) | -1.38 (0.94) |
| <i>Mother Breast Milk Sample</i>     |              |              |              |              |
| Days of lactation, days <sup>b</sup> | 10.6 (6.4)   | 10.9 (6.7)   | 9.5 (6.9)    | 5.8 (2.5)    |

---

Values shown are Mean (SD) for continuous variables or N (%) for dichotomous.

The columns show the clinical values for the subset of the total cohort with breast milk fatty acids measured and post-QC for genetic data.

<sup>a</sup> During the study periods 1 USD = approximately 80 Bangladesh Taka

<sup>b</sup> Days of lactation is equal to the age of the infant in days at breast milk sample time point
